# Supplementary material for: Behandlungszufriedenheit bei Patienten mit zervikaler Dystonie
Source: Springer Nature journal article supplement (doi:10.1007/s00115-021-01120-1), 2021-05-03
Supplement: MOESM1 [file 19126392]

## Anhang (Supplement)

Tabelle 1: Verwendung des Punktes 3 auf der Likert Skala (weder zufrieden noch unzufrieden):

Heutige Zufriedenheit DE/AT vs. global (Hauptstudienpopulation), 95% KI

| Monate | DE/AT                    | global                   |
|--------|--------------------------|--------------------------|
| 0      | <b>22,0</b> (13,2- 34,3) | <b>15,2</b> (13,0-17,8)  |
| 6      | <b>26,6</b> (18,0-37,3)  | <b>16,7</b> (14,5-19,2)  |
| 12     | <b>30,6</b> (21,1-42,0)  | <b>18,8</b> (16,4-21,5)  |
| 18     | <b>30,6</b> (21,1-42,0)  | <b>20,8</b> (18,2-23,6)  |
| 24     | <b>32,3</b> (21,9-44,7)  | <b>19,0</b> (16,4- 21,8) |
| 30     | <b>36,4</b> (24,9-49,6)  | <b>16,8</b> (14,4-19,6)  |
| 36     | <b>34,6</b> (23,1-48,2)  | <b>18,4</b> (15,8-21,4)  |
